# Supplementary material for: 磁铁敲断了还能吸起来吗——《磁铁的两极》教学反思
Source: PLOS journal article supplement (doi:10.1371/journal.pgen.1003575), 2004-01-01

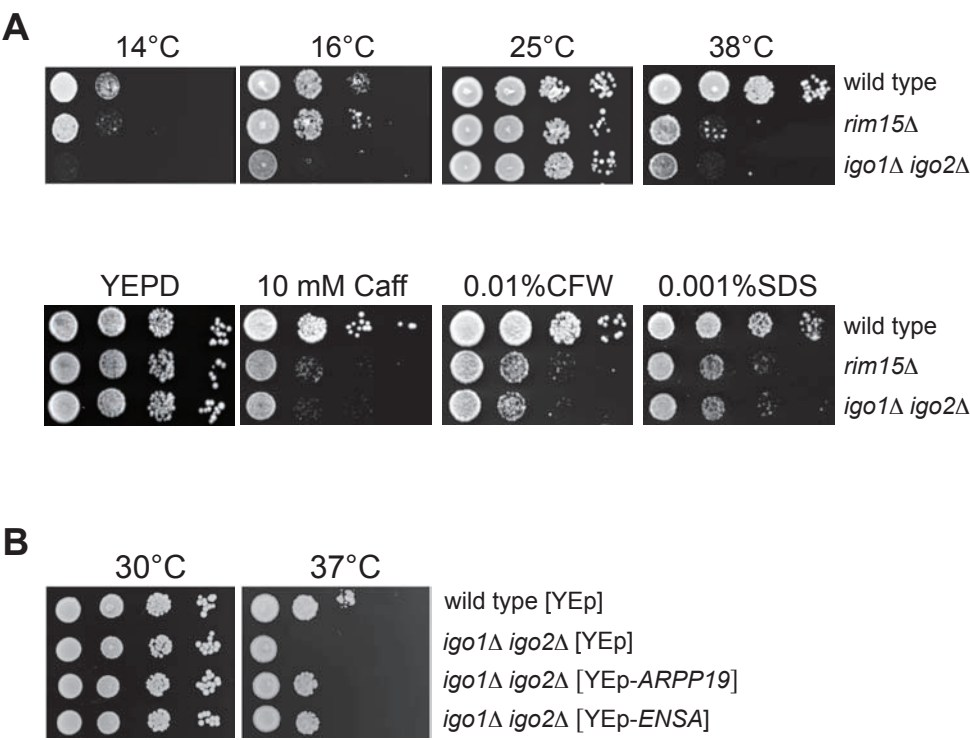

Supplement: S2 (10.1371/journal.pgen.1003575.s002) [file journal.pgen.1003575.s002]
